# Supplementary material
Source: publisher figshare collection journal article supplement (https://karger.figshare.com/ndownloader/files/8716687)
Supplement: Supplementary file 1 [file 8716687]

**Embase.com**

(kidney/exp OR 'kidney disease'/exp OR 'kidney blood vessel'/exp OR 'kidney surgery'/exp OR 'kidney function'/exp OR 'renal graft dysfunction'/exp OR 'kidney donor'/de OR nephrology/exp OR 'kidney perfusion'/de OR 'renal protection'/de OR 'kidney preservation'/de OR 'kidney blood flow'/de OR 'renal artery'/de OR (kidney* OR renal OR nephr*):ab,ti) AND ('ischemic preconditioning'/de OR 'ischemic postconditioning'/de OR (((ischem* OR ischaem*) NEXT/3 (precondition* OR postcondition* OR percondition* OR condition*)) OR ((brief OR 'short period' OR 'short periods' OR transien* OR intermit* OR continu* OR repeat* OR puls*) NEXT/3 (ischem* OR ischaem*))):ab,ti)

**Medline (OvidSP)**

(exp kidney/ OR exp "Kidney Diseases"/ OR exp "Kidney Transplantation"/ OR nephrology/ OR (kidney* OR renal OR nephr*).ab,ti.) AND ("ischemic preconditioning"/ OR "ischemic postconditioning"/ OR (((ischem* OR ischaem*) ADJ3 (precondition* OR postcondition* OR percondition* OR condition*)) OR ((brief OR "short period" OR "short periods" OR transien* OR intermit* OR continu* OR repeat* OR puls*) ADJ3 (ischem* OR ischaem*))).ab,ti.)

**Cochrane**

((kidney* OR renal OR nephr*):ab,ti) AND ((((ischem* OR ischaem*) NEXT/3 (precondition* OR postcondition* OR percondition* OR condition*)) OR ((brief OR 'short period' OR 'short periods' OR transien* OR intermit* OR continu* OR repeat* OR puls*) NEXT/3 (ischem* OR ischaem*))):ab,ti)

**Web-of-science**

TS=(((kidney* OR renal OR nephr*)) AND ((((ischem* OR ischaem*) NEAR/3 (precondition* OR postcondition* OR percondition* OR condition*)) OR ((brief OR "short period" OR "short periods" OR transien* OR intermit* OR continu* OR repeat* OR puls*) NEAR/3 (ischem* OR ischaem*)))))

**PubMed publisher**

((kidney*[tiab] OR renal[tiab] OR nephr*[tiab])) AND ((((ischem*[tiab] OR ischaem*[tiab]) AND (precondition*[tiab] OR postcondition*[tiab] OR percondition*[tiab] OR condition*[tiab])) OR ((brief[tiab] OR short period*[tiab] OR transien*[tiab] OR intermit*[tiab] OR continu*[tiab] OR repeat*[tiab] OR puls*[tiab]) AND (ischem*[tiab] OR ischaem*[tiab])))) AND publisher[sb]

**Google scholar**

Kidney|renal "ischemic preconditioning|postconditioning|perconditioning""ischemic * conditioning"
